1  
2  
3  
4  
5  
6  
7  
8  
9  
10  
11  
12  
13  
14  
15  
16  
17

## **Dynamic influences on static measures of metacognition**

**Kobe Desender<sup>1,2,3</sup>, Luc Vermeulen<sup>3</sup>, & Tom Verguts<sup>3</sup>**

1. Brain and Cognition, KU Leuven, Belgium

2. Department of Neurophysiology and Pathophysiology, University Medical Center Hamburg-Eppendorf,  
Germany

3. Department of Experimental Psychology, Ghent University, Belgium

### **Corresponding author:**

Dr. Kobe Desender

Brain and Cognition

KU Leuven

Tiensestraat 102, 3000 Leuven

Belgium

E-mail: [Kobe.Desender@KULeuven.be](mailto:Kobe.Desender@KULeuven.be)

18

**Abstract (245 words)**

19           Humans differ in their capability to judge the accuracy of their own choices via confidence  
20 judgments. Signal detection theory has been used to quantify the extent to which confidence tracks  
21 accuracy via M-ratio, often referred to as metacognitive efficiency. This measure, however, is static in  
22 that it does not consider the dynamics of decision making. This could be problematic because humans  
23 may shift their level of response caution to alter the tradeoff between speed and accuracy. Such shifts  
24 could induce unaccounted-for sources of variation in the assessment of metacognition. Instead, evidence  
25 accumulation frameworks consider decision making, including the computation of confidence, as a  
26 dynamic process unfolding over time. We draw on evidence accumulation frameworks to examine the  
27 influence of response caution on metacognition. Simulation results demonstrate that response caution has  
28 an influence on M-ratio. We then tested and confirmed that this was also the case in human participants  
29 who were explicitly instructed to either focus on speed or accuracy. We next demonstrated that this  
30 association between M-ratio and response caution was also present in an experiment without any  
31 reference towards speed. The latter finding was replicated in an independent dataset. In contrast, when  
32 data were analyzed with a novel dynamic measure of metacognition, which we refer to as v-ratio, in all of  
33 the three studies there was no effect of speed-accuracy tradeoff. These findings have important  
34 implications for research on metacognition, such as the question about domain-generalty, individual  
35 differences in metacognition and its neural correlates.

36

37

## Introduction

38           When asked to explicitly report how sure they are about their decisions, humans often claim high  
39 confidence for correct and low confidence for incorrect decisions. This capacity to evaluate the accuracy  
40 of decisions is often referred to as metacognitive accuracy. Although metacognitive accuracy about  
41 perceptual decisions is generally high<sup>1</sup>, it varies significantly between participants<sup>2</sup> and between  
42 conditions<sup>3</sup>. Such differences in metacognitive accuracy have important real-life consequences, as they  
43 relate, for example, to political extremism<sup>4</sup> and psychiatric symptoms<sup>5</sup>.

44           A debated question is how to quantify metacognitive accuracy. One prominent issue why one  
45 cannot simply calculate the correlation between confidence and accuracy<sup>6</sup> is that this confounds task  
46 accuracy with metacognitive accuracy; i.e. it is much easier to detect one's own mistakes in an easy task  
47 than in a hard task. Different solutions have been proposed in the literature, such as using coefficients  
48 from a logistic mixed-model<sup>7</sup>, type 2 ROC curves<sup>2</sup>, and meta- $d'$ <sup>8,9</sup>. Rather than providing an in-depth  
49 discussion and comparison of these different measures, we here focus on one of these static approaches,  
50 namely the meta- $d'$  framework, the state-of-the-art measure of metacognitive accuracy<sup>10</sup>. The meta- $d'$   
51 approach is embedded within signal detection theory, and quantifies the accuracy with which confidence  
52 ratings discriminate between correct and incorrect responses (*meta- $d'$* ) while controlling for first-order  
53 task performance ( $d'$ ). Because both measures are on the same scale, one can calculate the ratio between  
54 both, meta- $d'/d'$ , also called M-ratio, often referred to as metacognitive *efficiency*. When M-ratio is 1, all  
55 available first-order information is used in the (second-order) confidence judgment. When M-ratio is  
56 smaller than 1, metacognitive sensitivity is suboptimal, meaning that not all available information from  
57 the first-order response is used in the metacognitive judgment (Fleming & Lau, 2014). This measure has  
58 been used to address a variety of issues, such as whether metacognition is a domain-general capacity  
59 <sup>3,11,12</sup>, the neural correlates of metacognition<sup>13-16</sup>, how bilinguals differ from monolinguals<sup>17</sup>, and how  
60 individual differences in metacognitive accuracy correlate with various constructs<sup>4,5</sup>.

61           An important limitation is that the meta- $d'$  framework (just like the other static approaches cited  
62 above), does not consider dynamic aspects of decision making. Put simply, this measure depends on end-  
63 of-trial confidence and accuracy, but not on the response process governing the choice and its resulting  
64 reaction time. It is well known, however, that choice accuracy depends on response caution; i.e. accuracy  
65 decreases when instructing participants to be fast rather than to be correct. The fact that static approaches  
66 of metacognition do not consider response caution is problematic because it confounds ability with  
67 caution: when focusing on speed rather than accuracy, one will produce many errors due to premature  
68 responding, and those errors are much easier to detect compared to errors resulting from low signal

69 quality<sup>18</sup>. Importantly, detecting “premature” errors does not imply “good metacognition” per se, but  
70 instead simply depends on one’s level of response caution.

71 To account for dynamic influences on metacognition, we propose to instead quantify  
72 metacognitive accuracy in a dynamic probabilistic framework<sup>19,20</sup>. Sequential sampling models explain  
73 human decision making as a dynamic process of evidence accumulation<sup>21–23</sup>. Specifically, decisions are  
74 conceptualized as resulting from the accumulation of noisy evidence towards one of two decision  
75 boundaries. The first boundary that is reached, triggers its associated decision. The height of the decision  
76 boundary controls the response caution with which a decision is taken<sup>24,25</sup>. When lowering the boundary,  
77 decisions will be faster but less accurate; when increasing the boundary, decisions will be slower but  
78 more accurate. The prototypical dynamic sampling model is the drift diffusion model (DDM). In this  
79 model, confidence can be quantified as the probability of being correct, given evidence, decision time,  
80 and the decision that was made<sup>26–28</sup>. The relation between these three variables is represented by the heat  
81 map in Figure 1A. It captures the typical finding that trials with strong evidence are more likely to be  
82 correct than trials with weak evidence; and that trials with short RTs are more likely to be correct than  
83 trials with long RTs. As mentioned, the process of evidence accumulation terminates at the first boundary  
84 crossing. Formally, at that time the probability that the choice was correct can be quantified as  
85  $p(\text{correct}/e_t, t, X)$ , where  $e_t$  is the level of evidence at time  $t$ ,  $t$  is the timing of boundary crossing and  $X$  is  
86 the choice made<sup>26,28,29</sup>. In typical experiments, however, confidence judgments are provided separately in  
87 time (at time  $t + s$ , i.e., in a separate judgment after the choice), allowing evidence to further accumulate  
88 after boundary crossing. As a consequence, confidence should then be quantified as  $p(\text{correct}/e_{t+s}, t+s, X)$ ,  
89 <sup>19,20,30</sup>.

90 Within this formulation, good metacognitive accuracy can be considered as the ability to  
91 distinguish corrects versus errors based on  $p(\text{correct}/e_{t+s}, t+s, X)$ . Critically, the difference in the quantity  
92  $p(\text{correct}/e_{t+s}, t+s, X)$  for corrects versus errors, directly depends on the strength of post-decision  
93 accumulation. Thus, we can use post-decision drift rate as a dynamic measure of metacognitive accuracy.  
94 For comparison with the M-ratio framework, we quantified v-ratio as the ratio between post-decision drift  
95 rate and drift rate. Figure 1B shows post-decision accumulation for three scenarios with varying levels of  
96 v-ratio. As can be seen, if v-ratio is zero (left panel), additional evidence meanders adrift for both corrects  
97 and errors, and the model does not detect its own errors, i.e., representing a case of poor metacognitive  
98 accuracy. If however, v-ratio equals 1 (i.e., post-decision drift rate and drift rate are the same), additional  
99 evidence confirms most of the correct choices (i.e., leading to high confidence) and disconfirms most of  
100 the error choices (i.e., leading to low confidence), i.e., representing good metacognitive accuracy. We

101 thus propose that v-ratio can be used as a dynamic measure of metacognitive accuracy. In the following,  
 102 we will shed light on the role of variation in response caution on both M-ratio and v-ratio.

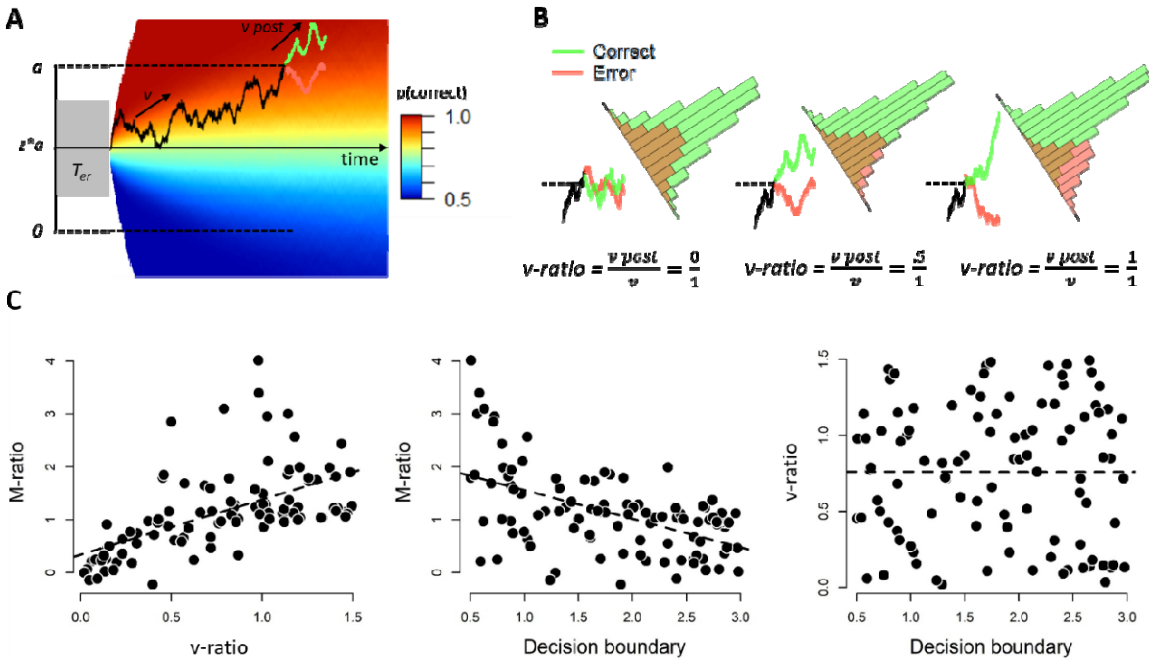

103

104 **Figure 1. Quantifying metacognitive accuracy within an evidence accumulation framework. A.**

105 *Noisy sensory evidence accumulates over time, until the integrated evidence reaches one of two decision*

106 *boundaries ( $a$  or  $0$ ). After the decision boundary is reached, evidence continues to accumulate. The heat*

107 *map shows the probability of being correct conditional on time, evidence, and the choice made (the*

108 *choice corresponding to the upper boundary, in this example). Confidence is quantified as just this*

109 *probability. B. Histograms of model-predicted confidence for different levels of v-ratio (reflecting the*

110 *ratio between post-decision drift rate and drift rate). Higher levels of v-ratio are associated with better*

111 *dissociating corrects from errors. C. Simulations from this dynamic evidence accumulation model show*

112 *that M-ratio captures variation in v-ratio ( $r = .58$ ; left panel), and critically, that M-ratio is also related*

113 *to the differences in decision boundary ( $r = -.52$ ; middle panel). By design, decision boundary and v-ratio*

114 *are unrelated to each other ( $r \sim 0$ ; right panel).*

115

## Results

### 116 Model simulations reveal a link between response caution and M-ratio

117 We simulated data from a drift diffusion model with additional post-decisional evidence

118 accumulation (see Figure 1A). Decision confidence was quantified as the probability of being correct

119 given evidence, time and choice<sup>26,30,31</sup>. We simulated data for 100 agents with 500 observations each; for

120 each agent, a different random value was selected for drift rate, non-decision time, decision boundary and  
121 post-decision drift rate (see Methods). We then used these data to compute M-ratio. As explained before,  
122 v-ratio was computed as the ratio between post-decision drift rate and drift rate. The results of our  
123 simulation study showed that, first, there was a clear positive relation between M-ratio and v-ratio,  $r(98)$   
124 = .58,  $p < .001$ , reflecting that M-ratio captures individual variation in metacognition (Figure 1C, left  
125 panel). However, we also observed a strongly negative relation between M-ratio and decision boundary,  
126  $r(98) = -.52$ ,  $p < .001$  (Figure 1C, central panel). This shows that M-ratio is highly dependent on the  
127 speed-accuracy tradeoff that one adopts. This occurs because lowering the decision boundary increases  
128 the probability of “fast errors” (i.e. due to noise), which are very likely to generate conflicting evidence in  
129 the post-decisional period (i.e. to be detected as an error). Finally, by design there was no relation  
130 between v-ratio and decision boundary,  $r(98) = .006$ ,  $p = .95$  (Figure 1C, right panel). The full correlation  
131 matrix is shown in Table 1.

|                      | 1    | 2    | 3       | 4      | 5 |
|----------------------|------|------|---------|--------|---|
| 1. Drift rate        | -    |      |         |        |   |
| 2. Non-decision time | .05  | -    |         |        |   |
| 3. Decision boundary | -.05 | .09  | -       |        |   |
| 4. V-ratio           | .01  | .01  | .00     | -      |   |
| 5. M-ratio           | .03  | -.08 | -.52*** | .58*** | - |

132  
133 *Table 1. Correlation table of the parameters from the model simulation. Note: \*\*\*<.001*

134 **Experiment 1: Explicit speed-accuracy instructions affect static but not dynamic measures**  
135 **of confidence**

136 Next, we tested these model predictions in an experiment with human participants. We recruited  
137 36 human participants who performed a task that has been widely used in the study of evidence  
138 accumulation models: discrimination of the net motion direction in dynamic random dot displays<sup>21</sup>.  
139 Participants were asked to decide whether a subset of dots was moving coherently towards the left or the  
140 right side of the screen (See Figure 2A). The percentage of dots that coherently moved towards the left or  
141 right side of the screen (controlling decision difficulty) was held constant throughout the experiment at  
142 20%. After their choice, and a blank screen, participants indicated their level of confidence using a  
143 continuous slider. Critically, in each block, participants either received the instruction to focus on  
144 accuracy (“try to decide as accurate as possible”), or to focus on speed (“try to decide as fast as  
145 possible”). Consistent with the instructions, participants were faster in the speed condition than in the  
146 accuracy condition,  $M_{speed} = 727\text{ms}$  versus  $M_{accuracy} = 1014\text{ms}$ ,  $t(35) = 4.47$ ,  $p < .001$ , and numerically

147 more accurate in the accuracy condition than in the speed condition,  $M_{accurate} = 75.6\%$  vs  $M_{speed} = 73.8\%$ ,  
 148  $t(35) = 1.63$ ,  $p = .111$ . Participants were also more confident in the accuracy condition than in the speed  
 149 condition,  $M_{accuracy} = 70$  versus  $M_{speed} = 67$ ,  $t(35) = 3.57$ ,  $p = .001$  (See Figure 2D).

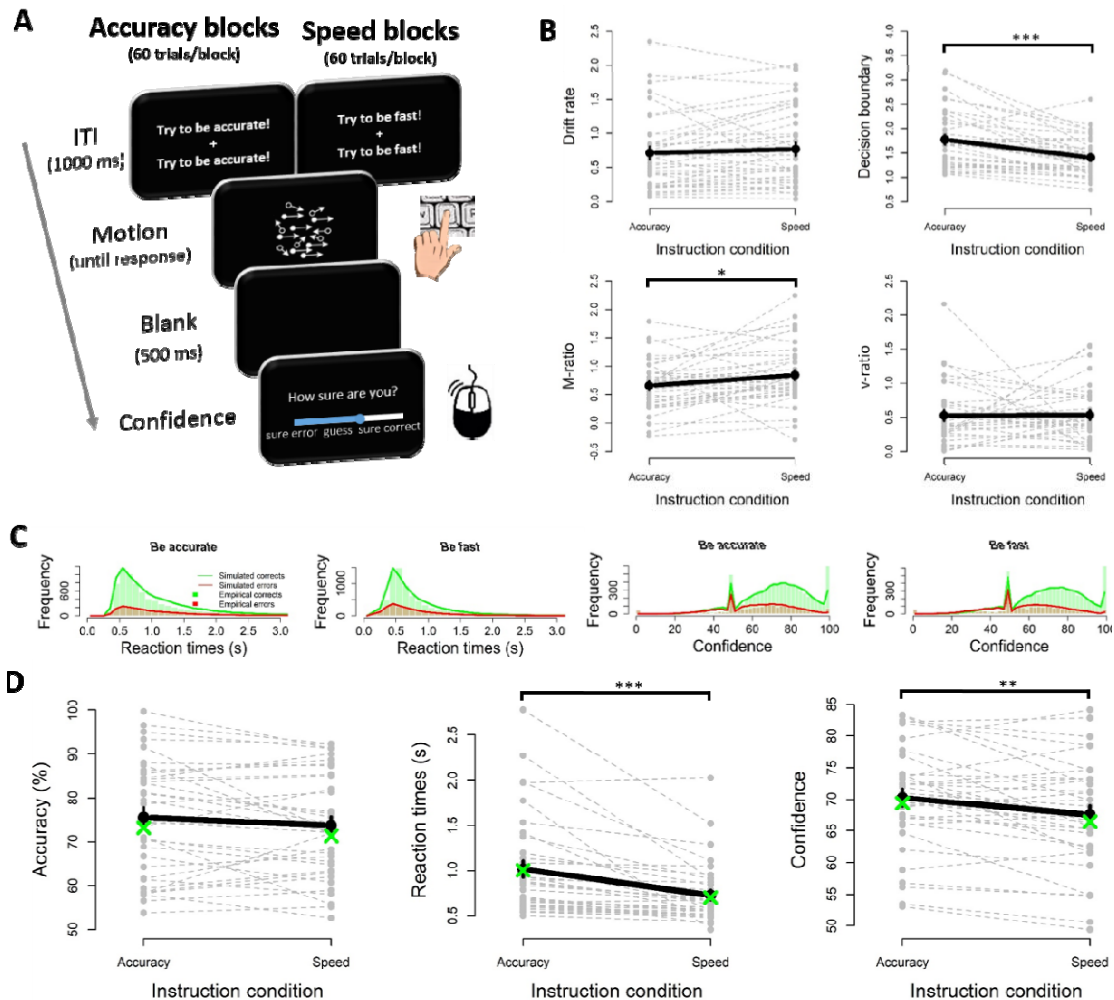

150

151 **Figure 2. The influence of speed-accuracy instructions on metacognitive accuracy**  
 152 **(Experiment 1).** **A.** Sequence of events in the experimental task. Participants decided whether the  
 153 majority of dots were moving left or right, by pressing “E” or “T” with their left hand. After a short  
 154 blank, they then indicated their level of confidence on a continuous scale. Depending on the block,  
 155 instructions during the ITI were either to focus on accuracy or to focus on speed. **B.** Fitted parameters of  
 156 a drift diffusion model with additional post-decision accumulation. Fitted decision boundaries were lower  
 157 in the speed vs accuracy condition, whereas drift rates did not differ. Critically, M-ratio was higher in the  
 158 speed vs accuracy condition whereas v-ratio did not differ between both instruction conditions. **C.**  
 159 Distribution of reaction times and confidence for empirical data (bars) and model fits (lines), separately

160 *for corrects (green) and errors (red). D. Participants were faster, less accurate and less confident when*  
161 *instructed to focus on speed rather than on accuracy. Note: grey lines show individual data points; black*  
162 *lines show averages; green dots show model fits; error bars reflect SEM; \*\*\* $p < .001$ , \*\* $p < .01$ , \* $p < .05$ .*

163

164 To shed further light on the underlying cognitive processes, we fitted these data using the  
165 evidence accumulation model described in Figure 1A. The basic architecture of our model was a DDM, in  
166 which noisy perceptual evidence accumulates over time until a decision boundary is reached. Afterwards,  
167 evidence continued to accumulate for a specified amount of time<sup>19</sup>. In addition to drift rate, decision  
168 boundary and non-decision time, our model featured a free parameter controlling the strength of the post-  
169 decision evidence accumulation ( $v$ -ratio, reflecting the ratio between post-decision drift rate and drift rate)  
170 and two further parameters controlling the mapping from  $p(\text{correct})$  onto the confidence scale (see  
171 Methods). Generally, our model fitted the data well, as it captured the distributional properties of both  
172 reaction times and decision confidence (see Figure 2C). As a first sanity check, we confirmed that  
173 decision boundaries were indeed different between the two instruction conditions,  $M_{\text{speed}} = 1.40$  versus  
174  $M_{\text{accuracy}} = 1.77$ ,  $t(35) = 4.60$ ,  $p < .001$ , suggesting that participants changed their decision boundaries as  
175 instructed. Also non-decision time tended to be a bit shorter in the speed condition compared to the  
176 accuracy condition,  $M_{\text{speed}} = 309\text{ms}$  versus  $M_{\text{accuracy}} = 390\text{ms}$ ,  $t(35) = 3.19$ ,  $p = .003$ . Drift rates did not  
177 differ between both instruction conditions,  $p = .368$ . There was a small but significant difference between  
178 the two instruction conditions in the two additional parameters controlling the idiosyncratic mapping  
179 between  $p(\text{correct})$  and the confidence scale, reflecting that in the accuracy condition confidence  
180 judgments were slightly higher,  $t(35) = 2.506$ ,  $p = .017$ , and less variable,  $t(35) = 2.206$ ,  $p = .034$ ,  
181 compared to the speed condition.

182 We next focused on metacognitive accuracy in both conditions (see Figure 2B). In line with the  
183 model simulations, our data showed that M-ratio was significantly affected by the speed-accuracy tradeoff  
184 instructions,  $M_{\text{speed}} = 0.84$  versus  $M_{\text{accuracy}} = 0.66$ ,  $t(35) = 2.26$ ,  $p = .030$ . Moreover, apart from these  
185 between-condition differences we also observed significant correlations between M-ratio and decision  
186 boundary both in the accuracy condition,  $r(34) = -.36$ ,  $p = .030$ , and in the speed condition,  $r(34) = -.53$ ,  $p$   
187  $< .001$ . Consistent with the notion that metacognitive accuracy should not be affected by differences in  
188 decision boundary,  $v$ -ratio did not differ between both instruction conditions,  $p = .938$ .

189 **Experiment 2: Spontaneous differences in response caution relate to static but not dynamic**  
190 **measures of metacognitive accuracy**



191           Although Experiment 1 provides direct evidence that changes in decision boundary affect M-  
192 ratio, it remains unclear to what extent this is also an issue in experiments without speed stress. Notably,  
193 in many metacognition experiments, participants do not receive the instruction to respond as fast as  
194 possible. Nevertheless, it remains possible that participants implicitly decide on a certain level of response  
195 caution. For example, a participant who is eager to finish the experiment quickly might adopt a lower  
196 decision boundary compared to a participant who is determined to perform the experiment as accurate as  
197 possible, thus leading to a natural across-subject variation in decision boundaries. To examine this  
198 possibility, in Experiment 2 we analyzed data from an experiment in which participants ( $N = 63$ ) did not  
199 receive any specific instructions concerning speed or accuracy. Participants decided which of two boxes  
200 contained more dots, and afterwards indicated their level of confidence on a continuous scale (see Figure  
201 3A). The same evidence accumulation model as before was used to fit these data, and again this model  
202 captured both reaction times and decision confidence distributions (Figure 3B). Consistent with our  
203 model simulations, model fits showed a positive correlation between M-ratio and v-ratio,  $r(61) = .21, p =$   
204  $.092$ , although this correlation was not statistically significant (Figure 3C). However, we again observed  
205 that M-ratio correlated negatively with the fitted decision boundary,  $r(61) = -.34, p = .006$ , whereas v-  
206 ratio did not,  $r(61) = -.19, p = .129$ .

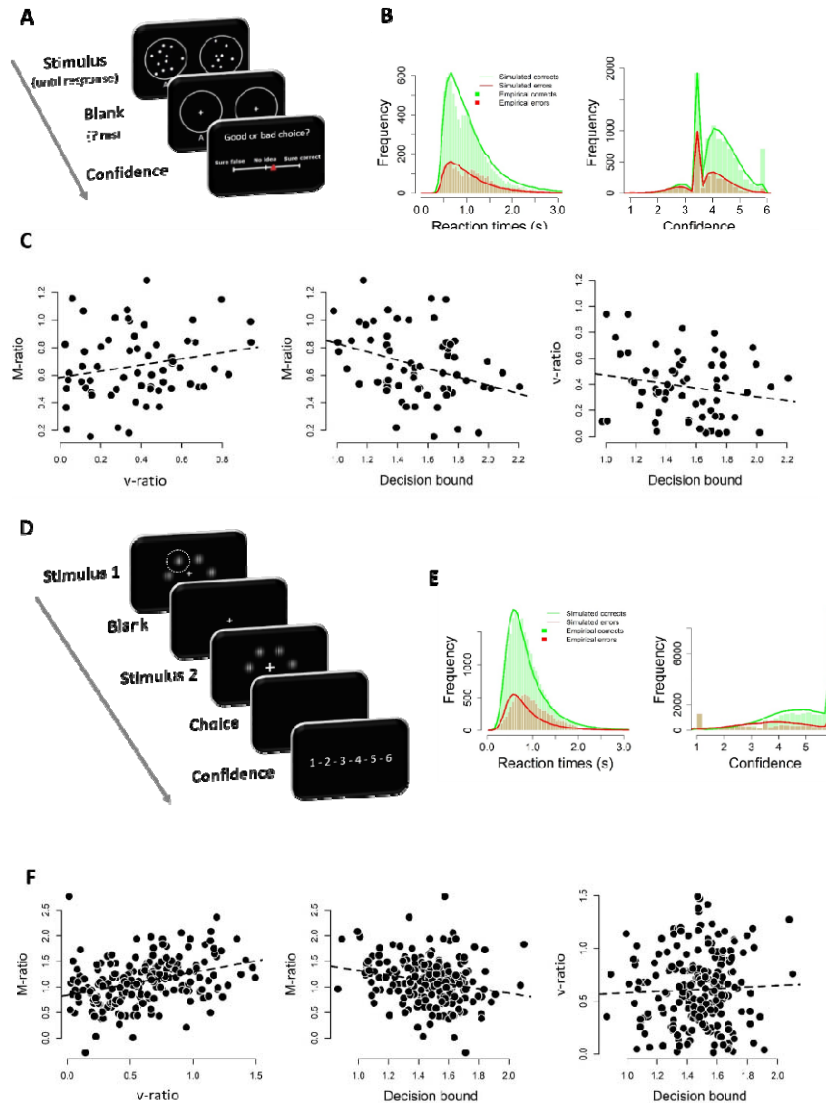

207

208 **Figure 3. The influence of spontaneous variations in speed-accuracy tradeoff on metacognitive**

209 **accuracy.** **A.** Sequence of events in Experiment 2. On each trial participants decided which of the two

210 circles contained more dots. Afterwards, they indicated their level of confidence on a continuous scale.

211 Note that participants did not receive any instructions concerning speed or accuracy. **B.** Distribution of

212 reaction times and confidence for Experiment 2, using the same conventions as in Figure 2. **C.** The data

213 of Experiment 2 showed a non-significant positive relation between M-ratio and v-ratio ( $r=.21$ ).

214 Critically, only M-ratio correlated negatively with decision boundary ( $r=-.34$ ) whereas this relation was

215 not significant for v-ratio ( $r= -.19$ ). **D.** Sequence of events in Experiment 3. On each trial, participants

216 decided in which temporal interval (first or second) one of the Gabor patches had a higher contrast. After

217 this choice, participants indicated confidence on a continuous scale. **E.** Distribution of reaction times and

218 confidence for Experiment 3, using the same conventions as in Figure 2. **F.** The data of Experiment 3

219 *showed a significant positive relation between M-ratio and v-ratio ( $r=.38$ ) and a significant negative*  
220 *correlation between M-ratio and decision boundary ( $r=-.18$ ) but not between v-ratio and decision*  
221 *boundary ( $r= -.04$ ).*

222

### 223 **Experiment 3: Replication in an independent dataset**

224 To assess the robustness of our findings, in Experiment 3 we aimed to replicate our analysis in an  
225 independent dataset with high experimental power. To achieve this, we searched the confidence database  
226 <sup>32</sup> for studies with high power ( $N > 100$ ) in which a 2CRT task was performed with separate confidence  
227 ratings given on a continuous scale. Moreover, because our fitting procedure was not designed for  
228 multiple levels of difficulty, we focused on studies with a single difficulty level. We identified one study  
229 that satisfied all these constraint (Figure 3D; Prieto, Reyes & Silva, *under review*). Their task was highly  
230 similar to the one reported above, but their high experimental power ( $N=204$ ) assured a very sensitive  
231 analysis of our claims. Consistent with the previous analysis, model fits on this independent dataset  
232 showed a positive and statistically significant correlation between M-ratio and v-ratio,  $r(202) = .38, p <$   
233  $.001$ , suggesting that both variables capture shared variance reflecting metacognitive accuracy (see Figure  
234 3F). We again observed that M-ratio correlated negatively with the fitted decision boundary,  $r(202) = -$   
235  $.18, p = .009$ , whereas no relation with decision bound was found for v-ratio,  $r(202) = .04, p = .535$ .

236

## Discussion

237           Metacognitive accuracy is a quickly emerging field in recent years. Crucial to its study is a  
238 method to objectively quantify the extent to which participants are able to detect their own mistakes,  
239 regardless of decision strategy. We here report that a commonly used *static* measure of metacognitive  
240 accuracy (M-ratio) highly depends on the decision boundary – reflecting decision strategy – that is set for  
241 decision making. This was the case in simulation results, in an experiment explicitly manipulating the  
242 tradeoff between speed and accuracy, and in two datasets in which participants received no instructions  
243 concerning speed or accuracy. We propose an alternative, *dynamic*, measure of metacognitive accuracy  
244 (v-ratio) that does not depend on decision boundary.

245

### **Caution is warranted with static measures of metacognition**

246           The most important consequence of the current findings is that researchers should be cautious  
247 when interpreting static measures of metacognitive accuracy, such as M-ratio. In the following, we will  
248 discuss several examples where our finding might have important implications. In the last decade there  
249 has been quite some work investigating to what extent the metacognitive evaluation of choices is a  
250 domain-general process or not. These studies often require participants to perform different kinds of tasks,  
251 and then examine correlations in accuracy and in metacognitive accuracy between these tasks <sup>3,11–14,33</sup>. For  
252 example, Mazancieux and colleagues <sup>11</sup> asked participants to perform an episodic memory task, a  
253 semantic memory task, a visual perception task and a working memory task. In each task, participants  
254 rated their level of confidence after a decision. The results showed that whereas correlations between  
255 accuracy on these different tasks were limited, there was substantial covariance in metacognitive accuracy  
256 across these domains. Because in this study participants received no time limit to respond, it remains  
257 unclear whether this finding can be interpreted as evidence for a domain-general metacognitive monitor,  
258 or instead a domain-general response caution which caused these measures to correlate. Another popular  
259 area of investigation has been to unravel the neural signatures supporting metacognitive accuracy <sup>13,14,34–</sup>  
260 <sup>36</sup>. For example, McCurdy et al. observed that both visual and memory metacognitive accuracy correlated  
261 with precuneus volume, potentially pointing towards a role of precuneus in both types of metacognition.  
262 It remains unclear, however, to what extent differences in response caution might be responsible for this  
263 association. Although differences in response caution are usually found to be related to pre-SMA and  
264 anterior cingulate <sup>24,25</sup>, there is some suggestive evidence linking precuneus to response caution <sup>37</sup>.  
265 Therefore, it is important that future studies on neural correlates of metacognition rule out the possibility  
266 that their findings are caused by response caution. Finally, our study has important consequences for  
267 investigations into differences in metacognitive accuracy between specific, e.g. clinical, groups. For  
268 example, Folke and colleagues <sup>17</sup> reported that M-ratio was reduced in a group of bilinguals compared to  
269

270 a matched group of monolinguals. Interestingly, they also observed that on average bilinguals had shorter  
271 reaction times than monolinguals, but this effect was unrelated to the group difference in M-ratio.  
272 Because these authors did not formally model their data using evidence accumulation models, however, it  
273 remains unclear whether this RT difference results from a difference in boundary, and if so to what extent  
274 this explains the difference in M-ratio between both groups that was observed. In a similar vein,  
275 individual differences in M-ratio have been linked to psychiatric symptom dimensions, and more  
276 specifically to a symptom dimension related to depression and anxiety<sup>5</sup>. At the same time, it is also  
277 known that individual differences in response caution are related to a personality trait known as *need for*  
278 *closure*<sup>38</sup>. Given that need for closure is, in turn, related to anxiety and depression<sup>39</sup>, it remains a  
279 possibility that M-ratio is only indirectly related to these psychiatric symptoms via response caution.

280

### 281 **The potential of dynamic measures of metacognition**

282 In order to control for potential influences of response caution on measures of metacognitive  
283 accuracy, one approach could be to estimate the decision boundary and examine whether the relation  
284 between metacognitive accuracy and the variable of interest remains when controlling for decision  
285 boundary (e.g., using mediation analysis). However, a more direct approach would be to estimate  
286 metacognitive accuracy in a dynamic framework, thus taking into account differences in response caution.  
287 In the current work, we proposed v-ratio (reflecting the ratio between post-decision drift rate and drift  
288 rate) as such a dynamic measure of metacognitive accuracy (following the observation that post-decision  
289 drift rate indexes how accurate confidence judgments are<sup>19,20</sup>). In both simulations and empirical data, we  
290 observed a positive relation between v-ratio and M-ratio, suggesting they capture shared variance.  
291 Critically, v-ratio was not correlated with decision boundary, suggesting it is not affected by differences  
292 in response caution. Thus, our dynamic measure of metacognition holds promise as a novel approach to  
293 quantify metacognitive accuracy while taking into account the dynamics of decision making.

294 In our approach we allowed the drift rate and the post-decision drift rate to dissociate. This  
295 proposal is in line with the view of metacognition as a second-order process whereby dissociations  
296 between confidence and accuracy might arise because of noise or bias at each level<sup>40-42</sup>. However, when  
297 formulating post-decision drift rate as a continuation of evidence accumulation, it remains underspecified  
298 which evidence the post-decision accumulation process is exactly based on. It has been suggested that  
299 participants can accumulate evidence that was still in the processing pipeline (e.g. in a sensory buffer)  
300 even after a choice was made<sup>30,43</sup>. However, it is not very likely that this is the only explanation,  
301 particularly in tasks without much speed stress. One other likely possibility, is that during the post-  
302 decision process, participants resample the stimulus from short-term memory<sup>44</sup>. Because memory is  
303 subject to decay, dissociations between the post-decision drift rate and the drift rate can arise. Other

304 sources of discrepancy might be contradictory information quickly dissipating from memory<sup>45</sup> which  
305 should lower metacognitive accuracy, or better assessment of encoding strength with more time<sup>46</sup> which  
306 should increase metacognitive accuracy.

307         To sum up, we provided evidence from simulations and empirical data that a common static  
308 measure of metacognition, M-ratio, is confounded with response caution. We proposed an alternative  
309 measure of metacognition based on a dynamic framework, v-ratio, which is insensitive to variations in  
310 caution, and may thus be suitable to study how metacognitive accuracy varies across subjects and  
311 conditions.

312

## Methods

313

### Computational model

314

#### Simulations

315

316

317

318

319

320

321

Data were simulated for 100 observers with 500 trials each. For each simulated observer, we randomly selected a value for the drift rate (uniform distribution between 0 and 2.5), for the decision boundary (uniform distribution between .5 and 3), for the non-decision time (uniform distribution between .2 and .6) and for the v-ratio (uniform distribution between 0 and 1.5; see below for details). To estimate meta- $d'$ , data is needed for both of the possible stimuli (i.e., to estimate bias); therefore, for half of the trials we multiplied the drift rate by -1. Finally, we fixed the values for starting point ( $z = .5$ ), within-trial noise ( $\sigma = 1$ ) and post-decision processing time (1s).

322

#### Fitting procedure

323

324

325

326

327

328

329

We coded an extension of the drift diffusion model (DDM) that simultaneously fitted choices, reaction times and decision confidence. The standard DDM is a popular variant of sequential sampling models of two-choice tasks. We used a random walk approximation, coded in the rcpp R package to increase speed<sup>47</sup>, in which we assumed that noisy sensory evidence started at  $z*a$ ; 0 and  $a$  are the lower and upper boundaries, respectively, and  $z$  quantifies bias in the starting point ( $z = .5$  means no bias). At each time interval  $\tau$  a displacement  $\Delta$  in the integrated evidence occurred according to the formula shown in equation (1):

$$\Delta = v * \tau + \sigma * \sqrt{\tau} * \mathcal{N}(0,1) \quad (1)$$

330

331

332

333

334

335

336

337

Evidence accumulation strength is controlled by  $v$ , representing the drift rate, and within-trial variability,  $\sigma$ , was fixed to 1. The random walk process continued until the accumulated evidence crossed either 0 or  $a$ . After boundary crossing, the evidence continued to accumulate for a duration depending on the participant-specific median confidence reaction time. Importantly, consistent with the signal detection theoretical notion that primary and secondary evidence can dissociate, we allowed for dissociations between the drift rate governing the choice and the post-decision drift rate. For compatibility with the M-ratio framework, we quantified metacognitive accuracy as the ratio between post-decision drift rate and drift rate, as shown in equation (2):

$$v\text{-ratio} = \frac{\text{post-decision drift rate}}{\text{drift rate}} \quad (2)$$

338

339

As a consequence, when v-ratio = 1, this implies that post-decision drift and drift are the same. When v-ratio = .5, the magnitude of the post-decision drift rate is half the magnitude of the drift rate. To

340 calculate decision confidence, we first quantified for each trial the probability of being correct given  
341 evidence, time, and choice. The heat map representing  $p(\text{correct}|e, t, X)$  is shown in Figure 1A, and was  
342 constructed by means of 300.000 random walks without absorbing bounds, with drift rates sampled from  
343 a uniform distribution between zero and ten. This assured sufficient data points across the relevant part of  
344 the heat map. Subsequently, the average accuracy was calculated for each (response time, evidence,  
345 choice) combination, based on all trials that had a data point for that (response time, evidence, choice)  
346 combination. Smoothing was achieved by aggregating over evidence windows of .01 and  $\tau$  windows of 3.  
347 Next, to take into account idiosyncratic mappings of  $p(\text{correct}|e, t, X)$  onto the confidence scale used in  
348 the experiment, we added two extra free parameters that controlled the mean ( $M$ ) and the width ( $SD$ ) of  
349 confidence estimates, as shown in equation (3):

$$\text{confidence} = \frac{p(\text{correct}|e_{t+s}, t + s, X) + M}{SD} \quad (3)$$

350 Although empirical confidence distributions appeared approximately normally distributed, there  
351 was an over-representation of confidence values at the boundaries (1 and 100 in Experiment 1; 1 and 6 in  
352 Experiments 2 and 3) and in the middle of the scale (50 in Experiment 1, 3.5 in Experiment 2). Most  
353 likely, this resulted from the use of verbal labels placed at exactly these values. To account for frequency  
354 peaks at the endpoints of the scale, we relabeled predicted confidence values that exceeded the endpoints  
355 of the scale as the corresponding endpoint (e.g., in Experiment 1 a predicted confidence value of 120 was  
356 relabeled as 100), which naturally accounted for the frequency peaks at the endpoints. To account for  
357 peaks in the center of the scale, we assumed that confidence ratings around the center were pulled towards  
358 the center value. Specifically, we relabeled  $P\%$  of trials around the midpoint as the midpoint (e.g., in  
359 Experiment 1,  $P = 10\%$  implies that 10% of the data closest to 50 were (re)labeled as 50). Note that  $P$  was  
360 not a free parameter, but instead its value was taken to be the participant-specific proportion based on the  
361 empirical data. Note that the main conclusions reported in this manuscript concerning the relation  
362 between  $M$ -ratio, decision boundary and post-decision drift rate, remain the same in a reduced model  
363 without  $P$ , and also in a reduced model without  $P$ ,  $M$  and  $SD$ . Because these reduced models did not  
364 capture confidence distributions very well though, we here report only the findings of the full model.

365 To estimate these 6 parameters ( $v$ ,  $a$ ,  $Ter$ ,  $v$ -ratio,  $M$ , and  $SD$ ) based on choices, reaction times  
366 and decision confidence, we implemented quantile optimization. Specifically, we computed the  
367 proportion of trials in quantiles .1, .3, .5, .7, and .9, for both reaction times and confidence; separately for  
368 corrects and errors (maintaining the probability mass of corrects and errors, respectively). We then used  
369 differential evolution optimization, as implemented in the DEoptim R package<sup>48</sup>, to estimate these 6  
370 parameters by minimizing the chi square error function shown in equation (4):



$$x^2 = \sum \frac{(oRT_i - pRT_i)^2}{pRT_i} + \sum \frac{(oCJ_i - pCJ_i)^2}{pCJ_i} \quad (4)$$

371 with  $oRT_i$  and  $pRT_i$  corresponding to the proportion of observed/predicted responses in quantile  $i$ ,  
372 separately calculated for corrects and errors both reaction times, and  $oCJ_i$  and  $pCJ_i$  reflecting their  
373 counterparts for confidence judgments. We set  $\tau$  to 1e-2. Model fitting was done separately for each  
374 participant. Note that in Experiment 3 there was no clear peak in the middle of the scale so  $P$  was fixed to  
375 0 in that experiment.

## 376 **Parameter recovery**

377 To assure that our model was able to recover the parameters, we here report parameter recovery.  
378 In order to assess parameter recovery with a sensible set of parameter combinations, we used the fitted  
379 parameters of Experiment 1 ( $N = 36$ ), simulated data from these parameters with a varying number of  
380 trials, and then tested whether our model could recover these initial parameters. As a sanity check, we  
381 first simulated a large number of trials (25000 trials per participant), which as expected provided excellent  
382 recovery for all six parameters,  $r_s > .97$ . We then repeated this process with only 200 trials per  
383 participants, which was the trial count in Experiment 2 (note that Experiment 1 and 3 both had higher trial  
384 counts). Recovery for  $v$ -ratio was still very good,  $r = .85$ , whereas it remained excellent for all other  
385 parameters,  $r_s > .98$ .

386

## 387 **Experiment 1**

### 388 **Participants**

389 Forty healthy participants (18 males) took part in Experiment 1 in return for course credit (mean  
390 age = 19.82, between 18 and 30). All reported normal or corrected-to-normal vision. Two participants  
391 were excluded because they required more than 10 practice blocks in one of the training blocks (see  
392 below) and two participants were excluded because their accuracy, averaged per block and then compared  
393 against chance level using a one-sample t-test, was not significantly above chance level. The final sample  
394 thus comprised thirty-six participants. All participants provided their informed consent and all procedures  
395 adhered to the general ethical protocol of the ethics committee of the Faculty of Psychology and  
396 Educational Sciences of Ghent University.

### 397 **Stimuli and apparatus**

398           The data for Experiment 1 were collected in an online study, due to COVID-19. Participants were  
399 allowed to take part in the experiment only when they made use of an external mouse. Choices were  
400 provided with the keyboard, and decision confidence was indicated with the mouse. Stimuli in  
401 Experiment 1 consisted of 50 randomly moving white dots (radius: 2 pixels) drawn in a circular aperture  
402 on a black background centered on the fixation point. Dots disappeared and reappeared every 5 frames.  
403 The speed of dot movement (number of pixel lengths the dot will move in each frame) was a function of  
404 the screen resolution (screen width in pixels / 650).

#### 405 **Task procedure**

406           Each trial started with the presentation of a fixation cross for 1000 ms. Above and below this  
407 fixation cross specific instructions were provided concerning the required strategy. In accuracy blocks the  
408 instruction was to respond as accurately as possible; in speed blocks the instruction was to respond as fast  
409 as possible. The order of this block-wise manipulation was counterbalanced across participants. Next,  
410 randomly moving dots were shown on the screen until a response was made or the response deadline was  
411 reached (max 5000 ms). On each trial, 20% of the dots coherently moved towards the left or the right side  
412 of the screen, with an equal number of leftward and rightward movement trials in each block. Participants  
413 were instructed to decide whether the majority of dots was moving towards the left or the right side of the  
414 screen, by pressing “E” or “T”, respectively, with their left hand. After their response, a blank screen was  
415 shown for 500 ms, followed by the presentation of a continuous confidence scale. Below the scale the  
416 labels “Sure error”, “guess”, and “sure correct” were shown, arranged outer left, centrally and outer right,  
417 respectively. After clicking the confidence scale, participants had to click a centrally presented  
418 “Continue” button (below the confidence scale) that ensured that the position of the mouse was central  
419 and the same on each trial.

420           The main part of Experiment 1 consisted of 10 blocks of 60 trials, half of which were from the  
421 accuracy instruction condition and half from the speed instruction condition. The experiment started with  
422 24 practice trials during which participants only discriminated random dot motion at 50% coherence, no  
423 confidence judgments were asked. This block was repeated until participants achieved 85% accuracy  
424 (mean = 2 blocks). Next, participants completed again 24 practice trials with the only difference that now  
425 the coherence was decreased to 20% (mean = 1.05 blocks). When participants achieved 60% accuracy,  
426 they then performed a final training block of 24 trials during which they practiced both dot discrimination  
427 and indicated their level of confidence (mean = 1.05 blocks).

#### 428 **Experiment 2**

429 Full experimental details are described in Drescher et al.<sup>49</sup>. On each trial participants were  
430 presented with two white circles (5.1° diameter) on a black background, horizontally next to each other  
431 with a distance of 17.8° between the midpoints. Fixation crosses were shown for 1s in each circle,  
432 followed by dots clouds in each circle for 700ms. The dots had a diameter of 0.4°. Dot positions in the  
433 boxes, as well as the position of the box containing more dots were randomly selected on each trial.  
434 Participants indicated which circle contained more dots by pressing “S” or “L” on a keyboard. Then, the  
435 question “correct or false?” appeared on the screen, with a continuous confidence rating bar, with the  
436 labels “Sure false”, “No idea”, and “Sure correct”. Participants moved a cursor with the same keys as  
437 before, and confirmed their confidence judgment with the enter key. No time limit was imposed for both  
438 primary choice and confidence rating. Subjects received several practice trials (10 without confidence  
439 rating, 14 with confidence rating), before they completed eight experimental blocks of 25 trials.

### 440 **Experiment 3**

441 Data from this experiment were taken from the confidence database<sup>50</sup>, a collection of openly  
442 available studies on decision confidence. In this experiment, Prieto, Reyes and Silva (unpublished paper),  
443 used the same task as described in Fleming and colleagues<sup>2</sup>. Each participant (N=204 woman, aged 18-  
444 35) completed 50 practice trials, followed by 5 blocks of 200 trials.

### 445 **Data and code availability**

446 All data and analysis code have been deposited online and can be freely accessed (insert link  
447 upon publication).

### 448 **Acknowledgments**

449 The authors like to thank Peter R Murphy, Bharath Chandra Talluri, and Annika Boldt for  
450 insightful discussions and Pierre Le Denmat, Robin Vloeberghs and Alan Voodla for comments on an  
451 earlier draft. This research was supported by an FWO [PEGASUS]<sup>2</sup> Marie Skłodowska-Curie fellowship  
452 (12T9717N, to K.D.) and a starting grant from the KU Leuven (STG/20/006, to K.D.). L.V. was  
453 supported by the FWO (11H5619N)

454

455

## References

- 456 1. Sanders, J. I., Hangya, B. & Kepecs, A. Signatures of a Statistical Computation in the Human  
457 Sense of Confidence. *Neuron* **90**, 499–506 (2016).
- 458 2. Fleming, S. M., Weil, R. S., Nagy, Z., Dolan, R. J. & Rees, G. Relating introspective accuracy to  
459 individual differences in brain structure. *Science (80-. )*. **329**, 1541–3 (2010).
- 460 3. Baird, B., Mrazek, M. D., Phillips, D. T. & Schooler, J. W. Domain-Specific Enhancement of  
461 Metacognitive Ability Following Meditation Training. *J. Exp. Psychol. Gen.* **143**, 1972–1979  
462 (2014).
- 463 4. Rollwage, M. *et al.* Metacognitive failure as a feature of those holding radical political beliefs.  
464 *Nat. Hum. Behav.* **2**, 637–644 (2018).
- 465 5. Rouault, M., Seow, T., Gillan, C. M. & Fleming, S. M. Psychiatric Symptom Dimensions Are  
466 Associated With Dissociable Shifts in Metacognition but Not Task Performance. *Biol. Psychiatry*  
467 **84**, 443–451 (2018).
- 468 6. Nelson, T. O. A comparison of current measures of the accuracy of feeling-of-knowing  
469 predictions. *Psychol. Bull.* **95**, 109–133 (1984).
- 470 7. Sandberg, K., Timmermans, B., Overgaard, M. & Cleeremans, A. Measuring consciousness: is  
471 one measure better than the other? *Conscious. Cogn.* **19**, 1069–78 (2010).
- 472 8. Fleming, S. M. HMeta-d: hierarchical Bayesian estimation of metacognitive efficiency from  
473 confidence ratings. *Neurosci. Conscious.* **3**, 1–14 (2017).
- 474 9. Maniscalco, B. & Lau, H. A signal detection theoretic approach for estimating metacognitive  
475 sensitivity from confidence ratings. *Conscious. Cogn.* **21**, 422–30 (2012).
- 476 10. Fleming, S. M. & Lau, H. C. How to measure metacognition. *Front. Hum. Neurosci.* **8**, 1–9  
477 (2014).
- 478 11. Mazancieux, A. *et al.* Is There a G Factor for Metacognition? Correlations in Retrospective  
479 Metacognitive Sensitivity Across Tasks Is There a G Factor for Metacognition? Correlations in  
480 Retrospective Metacognitive Sensitivity Across. *J. Exp. Psychol. Gen.* (2020).
- 481 12. Rouault, M., McWilliams, A., Allen, M. G. & Fleming, S. M. Human Metacognition Across  
482 Domains: Insights from Individual Differences and Neuroimaging. *Personal. Neurosci.* **1**, (2018).
- 483 13. McCurdy, L. Y. *et al.* Anatomical coupling between distinct metacognitive systems for memory

- 484 and visual perception. *J. Neurosci.* **33**, 1897–906 (2013).
- 485 14. Fleming, S. M., Ryu, J., Golfinos, J. G. & Blackmon, K. E. Domain-specific impairment in  
486 metacognitive accuracy following anterior prefrontal lesions. *Brain* **137**, 2811–2822 (2014).
- 487 15. Filevich, E., Dresler, M., Brick, X. T. R. & Ku, S. Metacognitive Mechanisms Underlying Lucid  
488 Dreaming. *J. Neurosci.* **35**, 1082–1088 (2015).
- 489 16. Rahnev, D. a, Maniscalco, B., Luber, B., Lau, H. C. & Lisanby, S. H. Direct injection of noise to  
490 the visual cortex decreases accuracy but increases decision confidence. *J. Neurophysiol.* **107**,  
491 1556–1563 (2012).
- 492 17. Folke, T., Ouzia, J., Bright, P., De Martino, B. & Filippi, R. A bilingual disadvantage in  
493 metacognitive processing. **150**, 119–132 (2016).
- 494 18. Scheffers, M. K. & Coles, M. G. Performance monitoring in a confusing world: error-related brain  
495 activity, judgments of response accuracy, and types of errors. *J. Exp. Psychol. Hum. Percept.*  
496 *Perform.* **26**, 141–151 (2000).
- 497 19. Pleskac, T. J. & Busemeyer, J. R. Two-stage dynamic signal detection: A theory of choice,  
498 decision time, and confidence. *Psychol. Rev.* **117**, 864–901 (2010).
- 499 20. Yu, S., Pleskac, T. J. & Zeigenfuse, M. D. Dynamics of Postdecisional Processing of Confidence.  
500 *J. Exp. Psychol. Gen.* **144**, 489–510 (2015).
- 501 21. Gold, J. I. & Shadlen, M. N. The neural basis of decision making. *Annu. Rev. Neurosci.* **30**, 535–  
502 561 (2007).
- 503 22. Ratcliff, R. & McKoon, G. The Diffusion Decision Model: Theory and Data for Two-Choice  
504 Decision Tasks. *Neural Comput.* **20**, 873–922 (2008).
- 505 23. Forstmann, B. U. & Wagenmakers, E.-J. Sequential Sampling Models in Cognitive Neuroscience:  
506 Advantages, Applications, and Extensions. *Annu. Rev. Psychol.* **67**, 641–666 (2016).
- 507 24. Bogacz, R., Wagenmakers, E.-J., Forstmann, B. U. & Nieuwenhuis, S. The neural basis of the  
508 speed-accuracy tradeoff. *Trends Neurosci.* **33**, 10–6 (2010).
- 509 25. Forstmann, B. U. *et al.* Striatum and pre-SMA facilitate decision-making under time pressure.  
510 *Proc. Natl. Acad. Sci. U. S. A.* **105**, 17538–42 (2008).
- 511 26. Kiani, R., Corthell, L. & Shadlen, M. N. Choice Certainty Is Informed by Both Evidence and  
512 Decision Time. *Neuron* **84**, 1329–1342 (2014).

- 513 27. Zylberberg, A., Fetsch, C. R. & Shadlen, M. N. The influence of evidence volatility on choice ,  
514 reaction time and confidence in a perceptual decision. *Elife* **5**, 1–31 (2016).
- 515 28. Drugowitsch, J., Moreno-Bote, R., Churchland, A. K., Shadlen, M. N. & Pouget, A. The Cost of  
516 Accumulating Evidence in Perceptual Decision Making. *J. Neurosci.* **32**, 3612–3628 (2012).
- 517 29. Moreno-Bote, R. Decision confidence and uncertainty in diffusion models with partially correlated  
518 neuronal integrators. *Neural Comput.* **22**, 1786–1811 (2010).
- 519 30. Van Den Berg, R. *et al.* A common mechanism underlies changes of mind about decisions and  
520 confidence. *Elife* 1–21 (2016) doi:10.7554/eLife.12192.
- 521 31. Desender, K., Donner, T. H. & Verguts, T. Dynamic expressions of confidence within an evidence  
522 accumulation framework. *bioRxiv* 1–29 (2020).
- 523 32. Rahnev, D. *et al.* The Confidence Database. *Nat. Hum. Behav.* **4**, (2020).
- 524 33. Song, C. *et al.* Relating inter-individual differences in metacognitive performance on different  
525 perceptual tasks. *Conscious. Cogn.* **20**, 1787–92 (2011).
- 526 34. Bor, D., Schwartzman, D. J., Barrett, A. B. & Seth, A. K. Theta-burst transcranial magnetic  
527 stimulation to the prefrontal or parietal cortex does not impair metacognitive visual awareness.  
528 *PLoS One* **1**, 165–175 (2016).
- 529 35. Rounis, E., Maniscalco, B., Rothwell, J. J. C., Passingham, R. R. E. & Lau, H. H. Theta-burst  
530 transcranial magnetic stimulation to the prefrontal cortex impairs metacognitive visual awareness.  
531 *Cogn. Neurosci.* **1**, 165–175 (2010).
- 532 36. Baird, B., Cieslak, M., Smallwood, J., Grafton, S. T. & Schooler, J. W. Regional White Matter  
533 Variation Associated with Domain-specific Metacognitive Accuracy. *J. Cogn. Neurosci.* 1–10  
534 (2014) doi:10.1162/jocn.
- 535 37. Van Maanen, L. *et al.* Neural Correlates of Trial-to-Trial Fluctuations in Response Caution. *J.*  
536 *Neurosci.* **31**, 17488–17495 (2011).
- 537 38. Evans, N. J., Rae, B., Bushmakin, M., Rubin, M. & Brown, S. D. Need for closure is associated  
538 with urgency in perceptual decision-making. *Mem. Cogn.* **45**, 1193–1205 (2017).
- 539 39. Freeman, D. *et al.* Delusions and decision-making style: Use of the Need for Closure Scale.  
540 *Behav. Res. Ther.* **44**, 1147–1158 (2006).
- 541 40. Fleming, S. M. & Daw, N. D. Self-evaluation of decision performance: A general Bayesian

- 542 framework for metacognitive computation. *Psychol. Rev.* **124**, 1–59 (2016).
- 543 41. Pasquali, A., Timmermans, B. & Cleeremans, A. Know thyself: metacognitive networks and  
544 measures of consciousness. *Cognition* **117**, 182–90 (2010).
- 545 42. Balsdon, T., Wyart, V. & Mamassian, P. Confidence controls perceptual evidence accumulation.  
546 *Nat. Commun.* **11**, (2020).
- 547 43. Resulaj, A., Kiani, R., Wolpert, D. M. & Shadlen, M. N. Changes of mind in decision-making.  
548 *Nature* **461**, 263–266 (2009).
- 549 44. Vlassova, A. & Pearson, J. Look Before You Leap: Sensory Memory Improves Decision Making.  
550 *Psychol. Sci.* **24**, 1635–1643 (2013).
- 551 45. Minson, J. A. & Umphres, C. Confidence in Context: Perceived Accuracy of Quantitative  
552 Estimates Decreases With Repeated Trials. *Psychol. Sci.* (2020) doi:10.1177/0956797620921517.
- 553 46. Nelson, T. O. & Dunlosky, J. When People’s Judgments of Learning are extremely accurate at  
554 predicting subsequent recall: The ‘Delayed-JOL effect’. *Psychol. Sci.* **2**, 267–270 (1991).
- 555 47. Eddelbuettel, D. Seamless R and C++ integration with Rcpp. *Seamless R C++ Integr. with Rcpp*  
556 **40**, 1–220 (2013).
- 557 48. Mullen, K. M., Ardia, D., Gil, D. L., Windover, D. & Cline, J. DEoptim: An R package for global  
558 optimization by differential evolution. *J. Stat. Softw.* **40**, 1–26 (2011).
- 559 49. Drescher, L. H., Van den Bussche, E. & Desender, K. Absence without leave or leave without  
560 absence: Examining the interrelations among mind wandering, metacognition, and cognitive  
561 control. *PLoS One* (2018).
- 562 50. Rahnev, D. *et al.* The Confidence Database. *Nat. Hum. Behav.* (2020) doi:10.1038/s41562-019-  
563 0813-1.
- 564
